CORRECTION

# Correction: Palliative care team consultation and quality of death and dying in a university hospital: A secondary analysis of a prospective study

Arianne Brinkman-Stoppelenburg, Frederika E. Witkamp, Lia van Zuylen, Carin C. D. van der Rijt, Agnes van der Heide

In Tables 6 and 7, the p-values presented did not reflect the Holm Bonferroni correction. The text and conclusions of the article are based on the corrected p-values. Please see the corrected Tables 6 and 7 here.

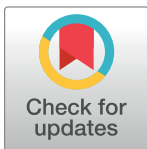

 OPEN ACCESS

**Citation:** Brinkman-Stoppelenburg A, Witkamp FE, van Zuylen L, van der Rijt CCD, van der Heide A (2018) Correction: Palliative care team consultation and quality of death and dying in a university hospital: A secondary analysis of a prospective study. PLoS ONE 13(11): e0208564. <https://doi.org/10.1371/journal.pone.0208564>

**Published:** November 29, 2018

**Copyright:** © 2018 Brinkman-Stoppelenburg et al. This is an open access article distributed under the terms of the [Creative Commons Attribution License](https://creativecommons.org/licenses/by/4.0/), which permits unrestricted use, distribution, and reproduction in any medium, provided the original author and source are credited.

**Table 6. End of life discussions, awareness and life closure according to relatives (N = 175).**

|                                                                                              |         | Without PCT consultation<br>n (%) | With PCT consultation<br>n(%) | X <sup>2</sup> | P value† |
|----------------------------------------------------------------------------------------------|---------|-----------------------------------|-------------------------------|----------------|----------|
| Patient had discussed preferences for medical treatment at end of life with somebody.        | Yes     | 57 (62)                           | 59 (82)                       | 7.79           | 0.070    |
|                                                                                              | No      | 35 (38)                           | 13 (18)                       |                |          |
|                                                                                              | Missing | 6                                 | 5                             |                |          |
| Patient had discussed preferences for medical treatment at end of life with family           | Yes     | 58 (59)                           | 60 (78)                       | 6.89           | 0.117    |
|                                                                                              | No      | 40 (41)                           | 17 (22)                       |                |          |
|                                                                                              | Missing | 0                                 | 0                             |                |          |
| Patient had discussed preferences for medical care at end of life with a GP                  | Yes     | 15 (16)                           | 27 (38)                       | 9.52           | 0.030    |
|                                                                                              | No      | 77 (84)                           | 45 (62)                       |                |          |
|                                                                                              | Missing | 6                                 | 5                             |                |          |
| Patient had discussed preferences for medical care at end of life with a medical specialist  | Yes     | 24 (26)                           | 27 (38)                       | 2.46           | 0.468    |
|                                                                                              | No      | 68 (74)                           | 45 (62)                       |                |          |
|                                                                                              | Missing | 6                                 | 5                             |                |          |
| Patient had discussed preferences for medical care at end of life with a nurse               | Yes     | 6 (7)                             | 9 (13)                        | 1.74           | 0.564    |
|                                                                                              | No      | 86 (93)                           | 63 (87)                       |                |          |
|                                                                                              | Missing | 6                                 | 5                             |                |          |
| Preferences were met?                                                                        | Yes     | 12 (48)                           | 13 (52)                       | 0.108          | 1.000    |
|                                                                                              | No      | 45 (52)                           | 42 (48)                       |                |          |
|                                                                                              | Missing | 41                                | 22                            |                |          |
| Would the relatives preferred to have more discussions on preferences and medical treatment? | Yes     | 23 (26)                           | 23 (32)                       | 1.02           | 1.000    |
|                                                                                              | No      | 48 (53)                           | 33 (46)                       |                |          |
|                                                                                              | DK*     | 19 (21)                           | 15 (21)                       |                |          |
|                                                                                              | Missing | 8                                 | 6                             |                |          |
| Patient was aware of imminent death                                                          | Yes     | 20 (22)                           | 28 (39)                       | 7.02           | 0.270    |
|                                                                                              | No      | 60 (64)                           | 32 (45)                       |                |          |
|                                                                                              | DK      | 13 (14)                           | 11 (16)                       |                |          |
|                                                                                              | Missing | 3                                 | 4                             |                |          |
| At what moment was the patient aware of imminent death?                                      | >72h    | 7 (13)                            | 20 (35)                       | 7.95           | 0.216    |
|                                                                                              | <72h    | 32 (59)                           | 28 (49)                       |                |          |
|                                                                                              | DK      | 15 (28)                           | 9 (16)                        |                |          |
|                                                                                              | Missing | 44                                | 20                            |                |          |
| Patient was able to say goodbye                                                              | Yes     | 38 (40)                           | 39 (56)                       | 8.03           | 0.216    |
|                                                                                              | No      | 55 (59)                           | 27(39)                        |                |          |
|                                                                                              | DK      | 1 (1)                             | 4 (6)                         |                |          |
|                                                                                              | Missing | 4                                 | 7                             |                |          |
| Patient was at peace with imminent death                                                     | Yes     | 34 (38)                           | 42 (57)                       | 6.81           | 0.297    |
|                                                                                              | No      | 28 (31)                           | 18 (25)                       |                |          |
|                                                                                              | DK      | 28 (31)                           | 13 (18)                       |                |          |
|                                                                                              | Missing | 8                                 | 4                             |                |          |
| Relative was aware of imminent death                                                         | Yes     | 37 (40)                           | 43 (59)                       | 6.01           | 0.322    |
|                                                                                              | No      | 53 (58)                           | 28 (38)                       |                |          |
|                                                                                              | DK      | 2 (2)                             | 2 (3)                         |                |          |
|                                                                                              | Missing | 6                                 | 4                             |                |          |
| At what moment was the relative aware of imminent death?                                     | >72h    | 20 (32)                           | 30 (48)                       | 3.35           | 0.335    |
|                                                                                              | <72h    | 42 (68)                           | 32 (52)                       |                |          |
|                                                                                              | Missing | 36                                | 15                            |                |          |

(Continued)

Table 6. (Continued)

|                                         |         | Without PCT consultation<br>n (%) | With PCT consultation<br>n(%) | X <sup>2</sup> | P value† |
|-----------------------------------------|---------|-----------------------------------|-------------------------------|----------------|----------|
| Relative said goodbye to patient        | Yes     | 44 (46)                           | 44 (62)                       | 4.00           | 0.322    |
|                                         | No      | 51 (54)                           | 27 (38)                       |                |          |
|                                         | Missing | 3                                 | 6                             |                |          |
| Relative was present at moment of death | Yes     | 71 (75)                           | 63 (88)                       | 4.21           | 0.320    |
|                                         | No      | 24 (25)                           | 9 (12)                        |                |          |
|                                         | Missing | 3                                 | 5                             |                |          |

† P-values were calculated using the Holm-Bonferroni method

\*DK = don't know

<https://doi.org/10.1371/journal.pone.0208564.t001>

Table 7. Hospital care in the last days of life according to relatives (N = 175).

|                                                                                                             |            | Without PCT<br>consultation<br>n (%) | With PCT<br>consultation<br>n(%) | X <sup>2</sup> | P value† |
|-------------------------------------------------------------------------------------------------------------|------------|--------------------------------------|----------------------------------|----------------|----------|
| Efforts to alleviate symptoms and problems last 3 days before death were sufficient                         | Yes        | 51 (56)                              | 43 (61)                          | 3.89           | 1.000    |
|                                                                                                             | No         | 7 (8)                                | 9 (13)                           |                |          |
|                                                                                                             | Partly     | 20 (22)                              | 8 (11)                           |                |          |
|                                                                                                             | NA*        | 10 (11)                              | 8 (11)                           |                |          |
|                                                                                                             | DK**       | 3 (3)                                | 3 (4)                            |                |          |
|                                                                                                             | Missing    | 7                                    | 6                                |                |          |
| Efforts to alleviate symptoms and problems last 24 hours before death were sufficient                       | Yes        | 62 (77)                              | 48 (71)                          | 0.53           | 1.000    |
|                                                                                                             | No         | 9 (10)                               | 7 (10)                           |                |          |
|                                                                                                             | Partly     | 13 (15)                              | 10 (15)                          |                |          |
|                                                                                                             | DK         | 2 (2)                                | 3 (4)                            |                |          |
|                                                                                                             | Missing    | 12                                   | 9                                |                |          |
|                                                                                                             |            |                                      |                                  |                |          |
| Social support the last 3 days before death were sufficient                                                 | Yes        | 49 (54)                              | 32 (46)                          | 4.28           | 1.000    |
|                                                                                                             | No         | 11 (12)                              | 15 (21)                          |                |          |
|                                                                                                             | Partly     | 12 (13)                              | 13 (19)                          |                |          |
|                                                                                                             | NA         | 11 (12)                              | 7 (10)                           |                |          |
|                                                                                                             | DK         | 7 (8)                                | 3 (4)                            |                |          |
|                                                                                                             | Missing    | 8                                    | 7                                |                |          |
| Social support the last 24 hours before death were sufficient                                               | Yes        | 54 (61)                              | 43 (66)                          | 3.66           | 1.000    |
|                                                                                                             | No         | 10 (11)                              | 10 (15)                          |                |          |
|                                                                                                             | Partly     | 17 (19)                              | 11 (17)                          |                |          |
|                                                                                                             | DK         | 7 (8)                                | 1 (2)                            |                |          |
|                                                                                                             | Missing    | 10                                   | 12                               |                |          |
|                                                                                                             |            |                                      |                                  |                |          |
| In the last days of life, <b>patient</b> participated sufficiently in decision making on medical treatment  | Yes        | 45 (52)                              | 34 (50)                          | 0.14           | 1.000    |
|                                                                                                             | No         | 14 (16)                              | 10 (15)                          |                |          |
|                                                                                                             | Sometimes  | 15 (17)                              | 13 (19)                          |                |          |
|                                                                                                             | DK         | 14 (16)                              | 11 (16)                          |                |          |
|                                                                                                             | Missing    | 10                                   | 9                                |                |          |
|                                                                                                             |            |                                      |                                  |                |          |
| In the last days of life, <b>relative</b> participated sufficiently in decision making on medical treatment | Yes        | 65 (74)                              | 47(67)                           | 0.97           | 1.000    |
|                                                                                                             | No         | 17 (19)                              | 18 (26)                          |                |          |
|                                                                                                             | DK         | 6 (7)                                | 5 (7)                            |                |          |
|                                                                                                             | Missing    | 10                                   | 7                                |                |          |
|                                                                                                             |            |                                      |                                  |                |          |
| Did the relative receive sufficient information in the last days before death?                              | Yes        | 66 (73)                              | 51 (72)                          | 1.60           | 1.000    |
|                                                                                                             | Too much   | 1 (1)                                | 3 (4)                            |                |          |
|                                                                                                             | Too little | 23 (26)                              | 17 (24)                          |                |          |
|                                                                                                             | Missing    | 8                                    | 6                                |                |          |
|                                                                                                             |            |                                      |                                  |                |          |
| Information that was given to the relative was understandable                                               | Yes        | 71 (79)                              | 49 (68)                          | 2.71           | 1.000    |
|                                                                                                             | No         | 1 (1)                                | 1 (1)                            |                |          |
|                                                                                                             | Partly     | 12 (13)                              | 13 (18)                          |                |          |
|                                                                                                             | No info    | 6 (7)                                | 9 (13)                           |                |          |
|                                                                                                             | Missing    | 8                                    | 5                                |                |          |
|                                                                                                             |            |                                      |                                  |                |          |
| Relatives were informed about imminent death                                                                | Yes        | 53 (58)                              | 46 (64)                          | 0.54           | 1.000    |
|                                                                                                             | No         | 38 (42)                              | 26 (36)                          |                |          |
|                                                                                                             | Missing    | 7                                    | 5                                |                |          |

(Continued)

Table 7. (Continued)

|                                                                                      |         | Without PCT consultation<br>n (%) | With PCT consultation<br>n(%) | X <sup>2</sup> | P value† |
|--------------------------------------------------------------------------------------|---------|-----------------------------------|-------------------------------|----------------|----------|
| Opportunity to discuss personal or religious preferences was sufficient              | Yes     | 46 (53)                           | 45 (64)                       | 6.536          | 0.532    |
|                                                                                      | No      | 15 (17)                           | 16 (23)                       |                |          |
|                                                                                      | DK      | 26 (30)                           | 9 (13)                        |                |          |
|                                                                                      | Missing | 11                                | 7                             |                |          |
| Attention was paid to personal or religious preferences                              | Yes     | 47 (51)                           | 40 (56)                       | 2.60           | 1.000    |
|                                                                                      | No      | 7 (8)                             | 10 (14)                       |                |          |
|                                                                                      | DK      | 35 (39)                           | 21 (29)                       |                |          |
|                                                                                      | Missing | 9                                 | 6                             |                |          |
| Attention to preferred rituals at the moment of death was sufficient                 | Yes     | 40 (49)                           | 36 (58)                       | 3.67           | 1.000    |
|                                                                                      | No      | 8 (10)                            | 10 (16)                       |                |          |
|                                                                                      | DK      | 34 (41)                           | 17 (27)                       |                |          |
|                                                                                      | Missing | 16                                | 14                            |                |          |
| Affirmation of the patient as a whole person was sufficient                          | Yes     | 56 (61)                           | 40 (58)                       | 2.02           | 1.000    |
|                                                                                      | No      | 8 (9)                             | 6 (9)                         |                |          |
|                                                                                      | Partly  | 19 (12)                           | 12 (17)                       |                |          |
|                                                                                      | DK      | 8 (9)                             | 11 (16)                       |                |          |
|                                                                                      | Missing | 7                                 | 8                             |                |          |
| Attention to wishes of patient and relatives in the days before death was sufficient | Yes     | 63 (70)                           | 55 (77)                       | 2.30           | 1.000    |
|                                                                                      | No      | 7 (8)                             | 6 (9)                         |                |          |
|                                                                                      | Partly  | 11 (12)                           | 7 (10)                        |                |          |
|                                                                                      | DK      | 9 (10)                            | 3 (4)                         |                |          |
|                                                                                      | Missing | 8                                 | 6                             |                |          |

† P-values were calculated using the Holm-Bonferroni method

\*NA = Not applicable

\*\* Don't know

<https://doi.org/10.1371/journal.pone.0208564.t002>

## Reference

1. Brinkman-Stoppelenburg A, Witkamp FE, van Zuylen L, van der Rijt CCD, van der Heide A (2018) Palliative care team consultation and quality of death and dying in a university hospital: A secondary analysis of a prospective study. *PLoS ONE* 13(8): e0201191. <https://doi.org/10.1371/journal.pone.0201191> PMID: 30138316
